# Supplementary figures and images for: The diffusion mechanism of water in conductive metal–organic frameworks
Source: Royal Society of Chemistry journal article supplement (doi:10.1039/d2cp01840c), 2022-01-01

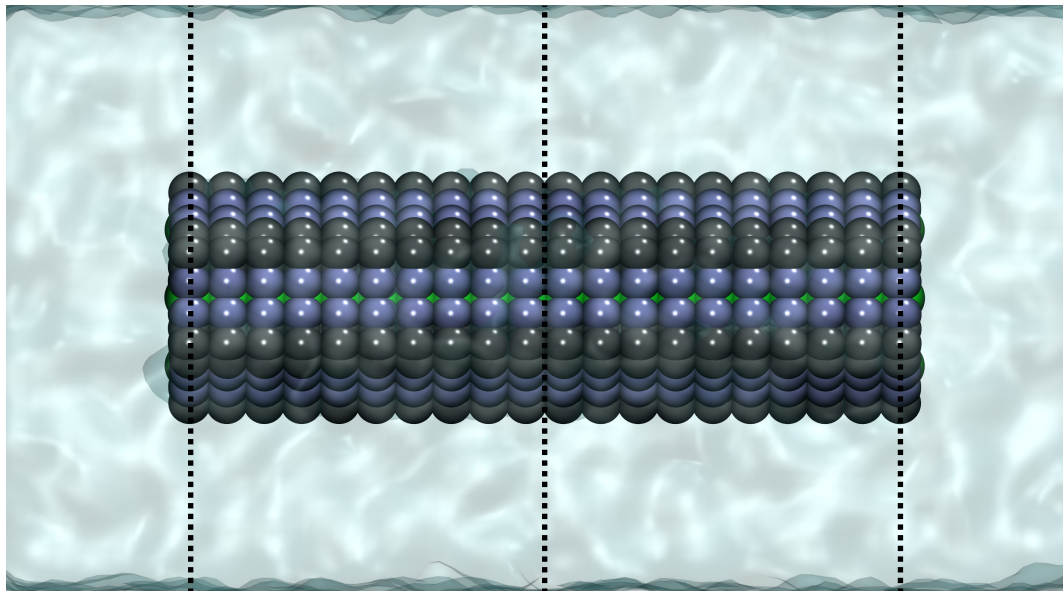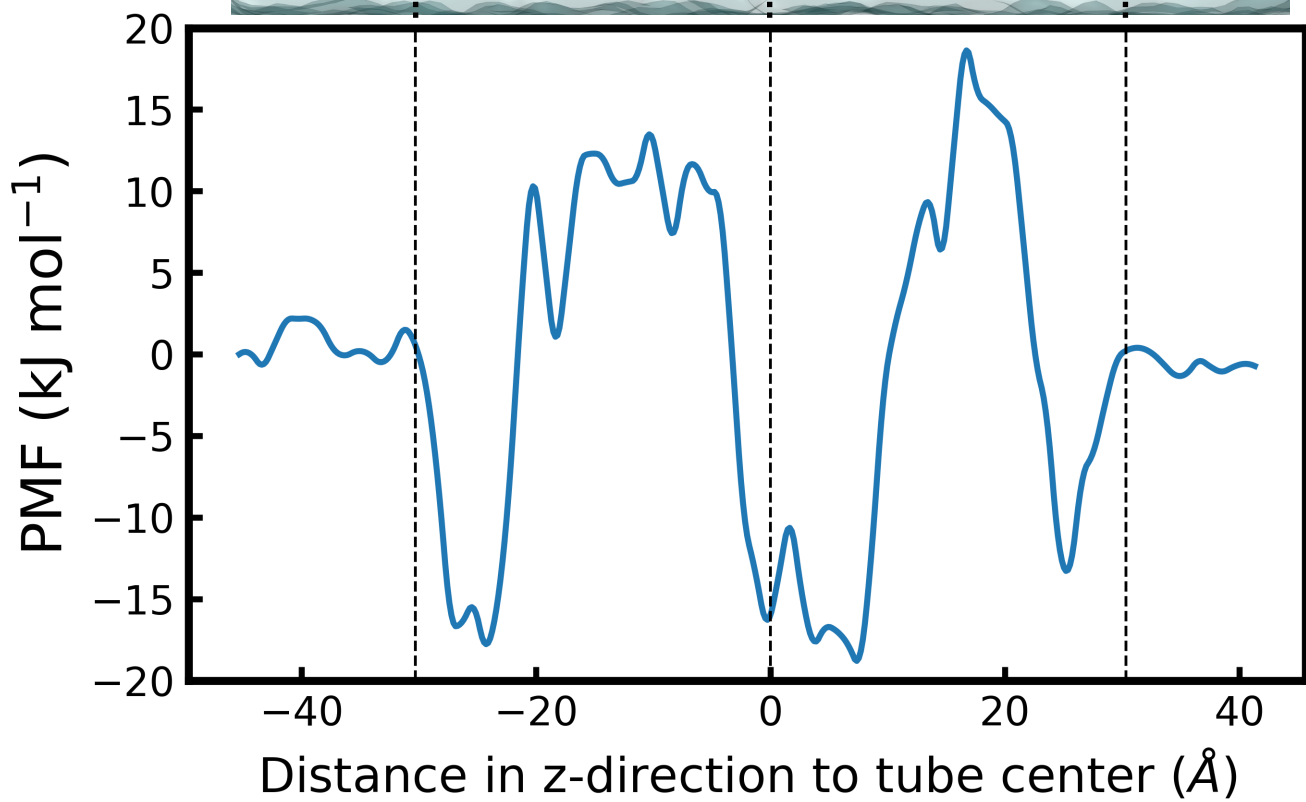

Supplement: d2cp01840c1.zip [file d2cp01840c1.zip]

**(a)**

Time: 0 ns

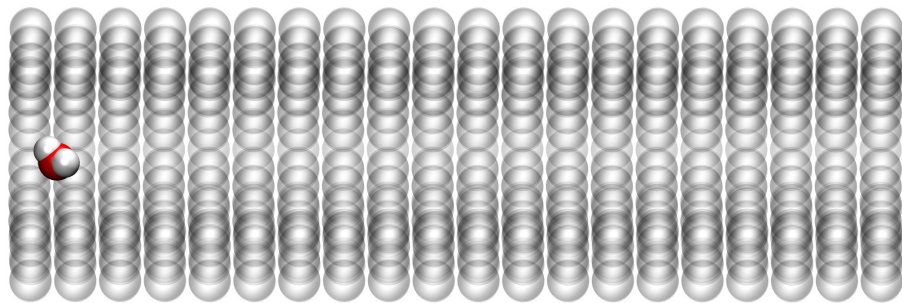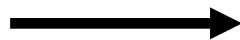

Time: 0.1 ns

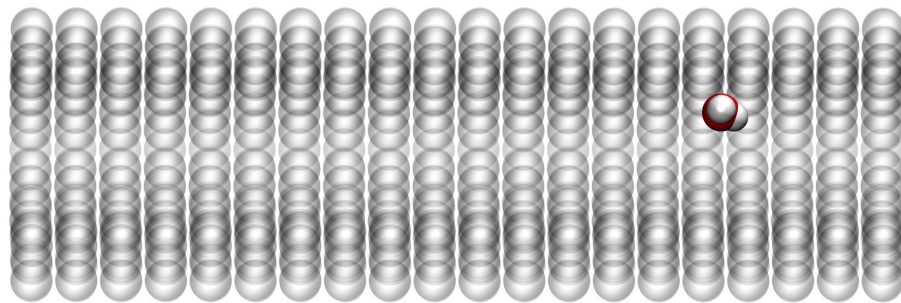

**(b)**

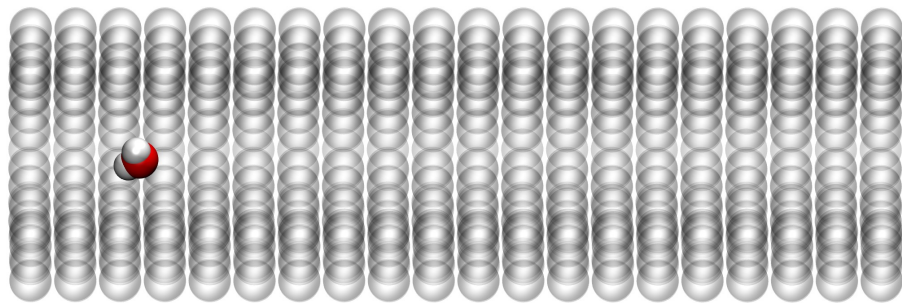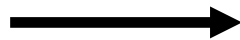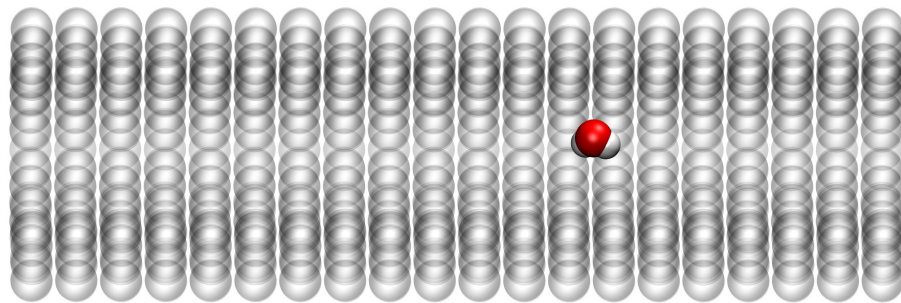

Supplement: d2cp01840c1.zip [file d2cp01840c1.zip]
